# Supplementary material for: Telephone-based aftercare groups for family carers of people with dementia – results of a mixed-methods process evaluation of a randomized controlled trial
Source: Springer Nature journal article supplement (doi:10.1186/s12913-023-09579-1), 2023-06-15
Supplement: MOESM1 [file 25490634]

| <b>1. Group details</b>             |                                                              |                                                                                             |                                               |
|-------------------------------------|--------------------------------------------------------------|---------------------------------------------------------------------------------------------|-----------------------------------------------|
| <b>1.1 group ID:</b>                | _____                                                        |                                                                                             |                                               |
| <b>1.2 date:</b>                    | _____                                                        |                                                                                             |                                               |
| <b>1.3 duration:</b>                | from _____ o'clock until _____ o'clock                       |                                                                                             |                                               |
| <b>1.4 moderator:</b>               | _____                                                        |                                                                                             |                                               |
| <b>1.5 theme:</b>                   | _____                                                        |                                                                                             |                                               |
| <b>2. Participation details</b>     |                                                              |                                                                                             |                                               |
| No.:                                | Participant's ID                                             | Participation:                                                                              | If no or partially, were there known reasons? |
| 2.1                                 | _____                                                        | <input type="checkbox"/> yes <input type="checkbox"/> no <input type="checkbox"/> partially | _____                                         |
| 2.2                                 | _____                                                        | <input type="checkbox"/> yes <input type="checkbox"/> no <input type="checkbox"/> partially | _____                                         |
| 2.3                                 | _____                                                        | <input type="checkbox"/> yes <input type="checkbox"/> no <input type="checkbox"/> partially | _____                                         |
| 2.4                                 | _____                                                        | <input type="checkbox"/> yes <input type="checkbox"/> no <input type="checkbox"/> partially | _____                                         |
| 2.5                                 | _____                                                        | <input type="checkbox"/> yes <input type="checkbox"/> no <input type="checkbox"/> partially | _____                                         |
| <b>3. Assessment of the session</b> |                                                              |                                                                                             |                                               |
| <b>3.1 Technical assessment:</b>    |                                                              |                                                                                             |                                               |
| <b>3.1.1</b>                        | <b>Was the voice quality good?</b>                           |                                                                                             |                                               |
|                                     | <input type="checkbox"/> yes                                 |                                                                                             |                                               |
|                                     | <input type="checkbox"/> no → please explain: _____          |                                                                                             |                                               |
| <b>3.1.2</b>                        | <b>Were there any disconnections?</b>                        |                                                                                             |                                               |
|                                     | <input type="checkbox"/> no                                  |                                                                                             |                                               |
|                                     | <input type="checkbox"/> yes → please explain: _____         |                                                                                             |                                               |
| <b>3.1.3</b>                        | <b>Were there delays or pauses due to technical defects?</b> |                                                                                             |                                               |
|                                     | <input type="checkbox"/> no                                  |                                                                                             |                                               |
|                                     | <input type="checkbox"/> yes → please explain: _____         |                                                                                             |                                               |
| <b>3.1.4</b>                        | <b>Other?</b>                                                |                                                                                             |                                               |
|                                     | _____                                                        |                                                                                             |                                               |

| <b>3.2 Assessment of the process and the contents</b> |                                                                                                                                                                                  |
|-------------------------------------------------------|----------------------------------------------------------------------------------------------------------------------------------------------------------------------------------|
| <b>3.2.1</b>                                          | <b>Could the planned formal procedure be adhered to?</b><br><input type="checkbox"/> yes<br><input type="checkbox"/> no → please explain:                                        |
| <b>3.2.2</b>                                          | <b>Topics addressed by the group participants in the discussion part</b>                                                                                                         |
| <b>3.2.3</b>                                          | <b>From the moderator's point of view, was the topic of interest to all group participants?</b><br><input type="checkbox"/> yes<br><input type="checkbox"/> no → please explain: |
| <b>3.2.4</b>                                          | <b>From the moderator's point of view, were the contents conveyed?</b><br><input type="checkbox"/> yes<br><input type="checkbox"/> no → please explain:                          |
| <b>3.2.5</b>                                          | <b>Were there any questions in the round that remained unanswered or could not be addressed further?</b><br><input type="checkbox"/> no<br><input type="checkbox"/> yes → Which? |

**4. Assessment of the group**

**4.1** Were there any conspicuous features in the group dynamics? (For example, were there particularly influential or withdrawn participants? Were there particular dynamics around specific themes or issues?)

no  
 yes → in relation to:

**4.2** Were there any problems for individual participants to get involved?

no  
 yes → please explain:

**4.3 Group atmosphere**

|    |             |   |   |   |   |   |   |   |           |
|----|-------------|---|---|---|---|---|---|---|-----------|
| a) | restless    | ① | ② | ③ | ④ | ⑤ | ⑥ | ⑦ | calm      |
| b) | objective   | ① | ② | ③ | ④ | ⑤ | ⑥ | ⑦ | affective |
| c) | sad         | ① | ② | ③ | ④ | ⑤ | ⑥ | ⑦ | hopeful   |
| d) | suspicious  | ① | ② | ③ | ④ | ⑤ | ⑥ | ⑦ | trustful  |
| e) | deprecating | ① | ② | ③ | ④ | ⑤ | ⑥ | ⑦ | solidary  |
| f) | anxious     | ① | ② | ③ | ④ | ⑤ | ⑥ | ⑦ | relaxed   |
| g) | open        | ① | ② | ③ | ④ | ⑤ | ⑥ | ⑦ | closed    |

**5. Self-reflective assessment of the moderator**

**5.1** Were there any problems for the facilitator in running the group? If so, which ones? (e.g., in conveying the contents, in the group dynamics)

**5.2** Other/comments for the next session (e.g., adjustments to the process and content, what should be addressed again in the next session)
