# Supplementary material for: Telephone-based aftercare groups for family carers of people with dementia – results of a mixed-methods process evaluation of a randomized controlled trial
Source: Springer Nature journal article supplement (doi:10.1186/s12913-023-09579-1), 2023-06-15
Supplement: MOESM4 [file 25490634]

## **Interview guide (6 months after the telephone groups)**

**Preprotocol** information can be taken from the available documents and does not need to be asked for.

General data/information:

- Age
- Gender
- Family relationship to the person in need of care (spouse, father, mother, etc.)
- Level of education

The following should be asked in advance:

- Degree of care (as it may have changed)
- Whether the person in need of care is still at home, in inpatient care, or has already died

### **Introductory question:**

Dear Mrs/Mr..., the telephone groups were held about half a year ago. Looking back, how do you feel about this offer?

### **Themes/contents of the groups:**

- Which topics or themes from the telephone groups are still present for you?
- Are there any topics or themes from the groups that still have a lasting effect or play a role for you and your relative? Can you give an example?

### **Questions about the transfer to everyday care:**

- What has changed in your daily care routine?
- Are there any changes in your daily care routine that you associate with the rehabilitation or the telephone groups of Talking Time-REHAB? If yes, which ones?
- Were you able to continue implementing the suggestions discussed in rehab at home? What were they?
- Has anything changed in your relationship or contact with your relative in need of care that you would relate to the telephone groups? If yes, what?

### **Family carer support groups**

- What is your attitude towards family groups? Has it changed after the telephone groups?
- Would you say that the exchange in the telephone group made you look for a relatives' group yourself?

### **Contact with the group**

- Do you still have contact with the group? Do you still exchange information with each other?
- If yes, would you have maintained this contact even without the group, e.g., because you knew the person from rehab?
- If no, can you say why not? (e.g., no interest, no time...)

### **Summary**

- Do you still use the folder/documents from Redezeit-Reha? If yes, in which way?
- In retrospect, would you have wished for more telephone-based support beyond the telephone groups? If so, for what reasons?
- Is there anything else you would like to add?

Thank you very much for your participation and openness in the interview!
